# Supplementary material for: Molecular Evolutionary Analyses of the Pseudomonas-Derived Cephalosporinase Gene
Source: MDPI journal article supplement (doi:10.3390/microorganisms11030635), 2023-03-01
Supplement: s1 [file s1]

**Supplementary Table S1. The genome samples used in the present study**

| <b>Genebank accession No.</b> | <b>Country</b> | <b>Collection year</b> |
|-------------------------------|----------------|------------------------|
| ALOF01000013                  | Australia      | 1975                   |
| AMVN01000116                  | Spain          | 2009                   |
| AOBK03000006                  | India          | 2012                   |
| AOIH01000020                  | Spain          | 2010                   |
| AXZJ01000019                  | India          | 2013                   |
| AYSK01000275                  | India          | 2012                   |
| AZBO01000022                  | India          | 2013                   |
| CP007399                      | USA            | 2012                   |
| CP010555                      | USA            | 1979                   |
| CP011369                      | Netherlands    | 2013                   |
| CP015001                      | Brazil         | 1997                   |
| CP020560                      | India          | 2014                   |
| CP026680                      | USA_ New York  | 2012                   |
| CP028331                      | France         | 2015                   |
| CP028368                      | France         | 2015                   |
| CP028959                      | China          | 2012                   |
| CP041354                      | Germany        | 2012                   |
| CP049161                      | Australia      | 2016                   |
| CP054472                      | Canada         | 2015                   |
| FM209186                      | England        | 1988                   |
| FR822745                      | Romania        | 2004                   |
| FR822746                      | Romania        | 2004                   |
| FR822747                      | Romania        | 2001                   |
| JAFBLI010000001               | China          | 2018                   |
| JF326295                      | Canada         | 2010                   |
| JF326297                      | Canada         | 2009                   |
| JF326299                      | Canada         | 2008                   |
| JF326301                      | Canada         | 2007                   |
| JGZW01000193                  | Canada         | 1988                   |
| JGZX01000002                  | Canada         | 1986                   |
| JGZY01000016                  | Canada         | 1982                   |
| JGZZ01000001                  | Canada         | 1987                   |
| JHEU01000936                  | Kazakhstan     | 2009                   |

|              |                |      |
|--------------|----------------|------|
| JJOD01000066 | India          | 2004 |
| JMBR02000059 | India          | 1995 |
| JMBS02000027 | India          | 1996 |
| JPFF01000002 | USA            | 2012 |
| JPYP01000015 | USA            | 2008 |
| JRGP01000011 | United Kingdom | 2009 |
| KX689751     | Viet Nam       | 2015 |
| LBIH01000023 | USA            | 2010 |
| LFDG01000016 | India          | 2013 |
| LFDH01000041 | India          | 2013 |
| LJJO01000079 | Australia      | 2012 |
| LKAF01000012 | United Kingdom | 2015 |
| LKPU01000016 | Canada         | 2012 |
| LLKP01000044 | Canada         | 1966 |
| LN831024     | Czech Republic | 1963 |
| LNDM01000012 | Germany        | 1995 |
| LOHH01000034 | USA            | 2007 |
| LOHI01000014 | USA            | 2008 |
| LOHK01000021 | USA            | 2006 |
| LRSF01000036 | USA            | 1999 |
| LRSG01000027 | USA            | 2004 |
| LRSJ01000025 | USA            | 2012 |
| LRYP01000002 | USA            | 2000 |
| LRYP01000057 | USA            | 2005 |
| LRYN01000031 | USA            | 2010 |
| LYO01000032  | USA            | 2004 |
| LYR01000078  | USA            | 2003 |
| LYU01000011  | USA            | 2004 |
| LYW01000009  | USA            | 2004 |
| LRZF01000006 | USA            | 2008 |
| LRZJ01000022 | USA            | 2005 |
| LRZM01000007 | USA            | 2006 |
| LRZP01000006 | USA            | 2012 |
| LRZQ01000025 | USA            | 2005 |
| LRZU01000019 | USA            | 2006 |

|              |                |      |
|--------------|----------------|------|
| LSAA01000015 | USA            | 2009 |
| MF098272     | USA            | 2016 |
| MF098274     | Canada         | 2016 |
| MF098276     | Canada         | 2016 |
| MF098282     | USA            | 2016 |
| MF098283     | USA            | 2016 |
| MF098285     | Taiwan         | 2016 |
| MF098288     | Australia      | 2016 |
| MF098289     | Japan          | 2016 |
| MF098296     | Canada         | 2016 |
| MF098302     | Japan          | 2016 |
| MF098303     | USA            | 2016 |
| MF098305     | United Kingdom | 2016 |
| MF281077     | Spain          | 2016 |
| MF281082     | Spain          | 2016 |
| NG_049892    | Canada         | 2009 |
| NG_049897    | Canada         | 2007 |
| NG_049899    | Canada         | 2007 |
| NG_049900    | Canada         | 2009 |
| NG_054965    | Venezuela      | 2016 |
| NG_054967    | USA            | 2016 |
| NG_054969    | Canada         | 2016 |
| NG_054971    | USA            | 2016 |
| NG_054973    | USA            | 2016 |
| NG_054974    | Philippines    | 2016 |
| NG_054975    | Argentina      | 2016 |
| NG_054978    | Taiwan         | 2016 |
| NG_054980    | Brazil         | 2016 |
| NG_054981    | Panama         | 2016 |
| NG_054984    | Puerto Rico    | 2016 |
| NG_054986    | South Africa   | 2016 |
| NG_054987    | Colombia       | 2016 |
| NG_054988    | Colombia       | 2016 |
| NG_054990    | Canada         | 2016 |
| NG_054991    | Canada         | 2016 |

|                    |                |      |
|--------------------|----------------|------|
| NG_054992          | Canada         | 2016 |
| NG_054993          | USA            | 2016 |
| NG_055274          | Israel         | 2016 |
| NG_055276          | Morocco        | 2016 |
| NG_055277          | Tunisia        | 2016 |
| NG_055278          | United Kingdom | 2016 |
| NG_055279          | Italy          | 2016 |
| NG_055281          | Saudi Arabia   | 2016 |
| NG_055282          | Portugal       | 2016 |
| NZ_CP024630        | China          | 2010 |
| NZ_CP025049        | USA            | 2014 |
| NZ_CP053117        | Australia      | 2017 |
| NZ_CP053706        | Taiwan         | 2003 |
| NZ_CP053917        | South Korea    | 2019 |
| NZ_JABGNI010000019 | United Kingdom | 2015 |
| NZ_JABGNL010000018 | United Kingdom | 2014 |
| NZ_JABGNM010000019 | United Kingdom | 2014 |
| NZ_JABGNR010000016 | United Kingdom | 2012 |
| NZ_JABGNS010000015 | United Kingdom | 2012 |
| NZ_JABGNU010000018 | United Kingdom | 2012 |
| NZ_JABGOD010000016 | United Kingdom | 2017 |
| NZ_JABGOH010000016 | United Kingdom | 2015 |
| NZ_JABLSN010000010 | Taiwan         | 2004 |
| NZ_JACEKE010000029 | United Kingdom | 2013 |
| NZ_JACEMH010000032 | United Kingdom | 2013 |
| NZ_JACEPL010000013 | France         | 2004 |
| NZ_JACEPP010000010 | France         | 2004 |
| NZ_JACWHC010000005 | Lebanon        | 2018 |
| NZ_JAGFEQ010000011 | Nigeria        | 2018 |
| NZ_JAGMWR010000017 | France         | 2018 |
| NZ_JAHBSB010000003 | USA            | 2021 |
| NZ_JAHBSD010000008 | USA            | 2020 |
| NZ_JAHBSE010000010 | USA            | 2020 |
| NZ_JWJU010000006   | Malaysia       | 2014 |
| NZ_KI519031        | USA            | 2013 |

|                 |                |      |
|-----------------|----------------|------|
| NZ_LDKQ01000006 | Canada         | 2011 |
| NZ_LLLT01000002 | France         | 1991 |
| NZ_LLLU01000013 | France         | 1992 |
| NZ_LLMW01000047 | USA            | 1995 |
| NZ_LLOY01000001 | France         | 1994 |
| NZ_LLPR01000004 | USA            | 2005 |
| NZ_LLVD01000038 | Tunisia        | 1998 |
| NZ_LR130528     | Switzerland    | 2017 |
| NZ_LRSF01000036 | USA            | 1999 |
| NZ_LRSI01000037 | USA            | 2011 |
| NZ_LRZZ01000005 | USA            | 2009 |
| NZ_MVGX01000011 | USA            | 1996 |
| NZ_MWLA01000064 | Spain          | 2005 |
| NZ_MWWL01000204 | Australia      | 2008 |
| NZ_MWYK01000002 | Canada         | 1988 |
| NZ_MWZF01000043 | Australia      | 2008 |
| NZ_NION01000023 | USA            | 2008 |
| NZ_NMRS01000019 | Pacific Ocean  | 2004 |
| NZ_NSRU01000013 | Australia      | 2007 |
| NZ_NSTL01000015 | Portugal       | 2005 |
| NZ_NSTR01000013 | USA            | 2005 |
| NZ_NSWW01000015 | Australia      | 2002 |
| NZ_NSWZ01000003 | Australia      | 2006 |
| NZ_NSYH01000036 | Australia      | 2008 |
| NZ_PDLR01000002 | USA            | 2001 |
| NZ_QVCW02000019 | USA            | 2001 |
| NZ_QZXE01000193 | Estonia        | 2013 |
| NZ_QZYT01000074 | Estonia        | 2012 |
| NZ_RAEF01000002 | Estonia        | 2012 |
| NZ_RAFH01000060 | Estonia        | 2005 |
| NZ_RHSA01000022 | Pakistan       | 2016 |
| NZ_RHTA01000011 | Pakistan       | 2016 |
| NZ_RHTB01000087 | Pakistan       | 2016 |
| NZ_RRB01000023  | United Kingdom | 2016 |
| NZ_RRBQ01000016 | United Kingdom | 2016 |

|                 |                |      |
|-----------------|----------------|------|
| NZ_RRBR01000037 | United Kingdom | 2016 |
| NZ_RRBV01000009 | United Kingdom | 2016 |
| NZ_RRBX01000028 | United Kingdom | 2017 |
| NZ_RRBY01000013 | United Kingdom | 2017 |
| NZ_RWLY01000006 | Canada         | 2014 |
| NZ_RWOB01000002 | Canada         | 2014 |
| NZ_RWOI01000016 | Canada         | 2014 |
| NZ_RWOK01000007 | Canada         | 2014 |
| NZ_RWTN01000011 | Canada         | 2007 |
| NZ_RWUV01000016 | Canada         | 2012 |
| NZ_RWZL01000003 | USA            | 2012 |
| NZ_RXFD01000011 | Australia      | 2009 |
| NZ_RXFE01000007 | Australia      | 2009 |
| NZ_RXUS01000020 | USA            | 2011 |
| NZ_RXVS01000089 | USA            | 2013 |
| NZ_SDVP01000023 | Mexico         | 2015 |
| NZ_VZIY01000029 | USA            | 2019 |
| NZ_WOAW01000013 | Australia      | 2005 |
| NZ_WUTP01000019 | Brazil         | 2017 |
| NZ_WXEV01000083 | India          | 2017 |
| PQBU01000013    | India          | 2009 |
| PQGF01000020    | Brazil         | 2009 |
| PUEW01000019    | Australia      | 2010 |
| PVXJ01000009    | France         | 2010 |
| QBEA01000013    | Brazil         | 1995 |
| QBEB01000012    | Brazil         | 1998 |
| QBED01000005    | Brazil         | 1995 |
| QBEE01000019    | Brazil         | 1995 |
| QBEG01000009    | Brazil         | 1994 |
| QBEO01000005    | Brazil         | 2015 |
| QBES01000012    | Brazil         | 2012 |
| QDGE01000015    | Australia      | 2003 |
| QDGF01000032    | Australia      | 2003 |
| QDGJ01000026    | Australia      | 2006 |
| QDGM01000012    | India          | 2004 |

|              |           |      |
|--------------|-----------|------|
| QDGR01000016 | Australia | 1992 |
| QDGS01000010 | Australia | 2003 |
| QDGU01000015 | Australia | 2004 |
| QDGX01000010 | India     | 1997 |
| QGSM01000012 | Germany   | 2014 |
| QJGW01000017 | USA       | 2010 |
| QJGX01000018 | USA       | 2010 |

---
